# Supplementary material for: Understanding Vaccine Hesitancy in Canada: Results of a Consultation Study by the Canadian Immunization Research Network
Source: PubMed Central journal article supplement (PMC4892544; doi:10.1371/journal.pone.0156118), 2016-06-03
Supplement: pone.0156118.s001.pdf [file pone.0156118.s001.pdf]

## SUPPORTING INFORMATION

### S1. Author List of the Social Sciences and Humanities Network of the Canadian Immunization Research Network

---

Eve Dubé<sup>1,2,3\*</sup>, Dominique Gagnon<sup>2</sup>, Manale Ouakki<sup>2</sup>, Julie A. Bettinger<sup>4</sup>, Maryse Guay<sup>2,5</sup>, Scott Halperin<sup>6</sup>, Kumanan Wilson<sup>7</sup>, Janice Graham<sup>8</sup>, Holly O. Witteman<sup>9,10</sup>, Shannon MacDonald<sup>11,12</sup>, William Fisher<sup>13</sup>, Laurence Monnais<sup>14</sup>, Dat Tran<sup>15</sup>, Arnaud Gagneur<sup>16</sup>, Juliet Guichon<sup>17</sup>, Vineet Saini<sup>18,19</sup>, Jane M. Heffernan<sup>20</sup>, Samantha Meyer<sup>21</sup>, S. Michelle Driedger<sup>22</sup>, Joshua Greenberg<sup>23</sup>, Heather MacDougall<sup>24</sup> on behalf of the Canadian Immunization Research Network<sup>^</sup>

---

<sup>1</sup> Département de médecine sociale et préventive, Université Laval, Québec, Québec, Canada

<sup>2</sup> Maladies infectieuses, Institut national de santé publique du Québec, Québec, Québec, Canada

<sup>3</sup> Maladies infectieuses et immunitaires, Centre de recherche du CHU de Québec – Université Laval, Québec, Québec, Canada

<sup>4</sup> Vaccine Evaluation Center, BC Children’s Hospital, and University of British Columbia, Vancouver, British Columbia, Canada

<sup>5</sup> Département des sciences de la santé communautaire, Université de Sherbrooke, Sherbrooke, Québec, Canada

<sup>6</sup> Department of Microbiology & Immunology, Dalhousie University, Halifax, Nova Scotia, Canada

<sup>7</sup> Clinical Epidemiology Program, Ottawa Hospital Research Institute, University of Ottawa, Ottawa, Ontario, Canada

<sup>8</sup> Department of Pediatrics, Dalhousie University, Halifax, Nova Scotia, Canada

<sup>9</sup> Département de médecine familiale et de médecine d’urgence, Université Laval, Québec, Québec, Canada

<sup>10</sup> Santé des populations et pratiques optimales en santé, Centre de recherche du CHU de Québec – Université Laval, Québec, Québec, Canada

<sup>11</sup> Nursing Faculty, University of Alberta, Edmonton, Alberta, Canada

<sup>12</sup> Department of Pediatrics, University of Calgary, Calgary, Alberta, Canada

<sup>13</sup> Department of Psychology, University of Western Ontario, London, Ontario, Canada

<sup>14</sup> Département d’Histoire, Université de Montréal, Montréal, Québec, Canada

<sup>15</sup> Division of Infectious Diseases, Hospital for Sick Children, Toronto, Ontario, Canada

<sup>16</sup> Département de pédiatrie, Service de néonatalogie, Université de Sherbrooke, Sherbrooke, Québec, Canada

<sup>17</sup> Department of Community Health Sciences, University of Calgary, Calgary, Alberta, Canada

<sup>18</sup> Department of Production Animal Health, University of Calgary, Calgary, Alberta, Canada

<sup>19</sup> Alberta Health Services, Calgary, Alberta, Canada

<sup>20</sup> Department of Mathematics and Statistics, York University, Toronto, Ontario, Canada

<sup>21</sup> School of Public Health and Health Systems, University of Waterloo, Waterloo, Ontario, Canada

<sup>22</sup> Department of Community Health Sciences, University of Manitoba, Winnipeg, Manitoba, Canada

<sup>23</sup> School of Journalism and Communication, Carleton University, Ottawa, Ontario, Canada

<sup>24</sup> Department of History, University of Waterloo, Waterloo, Ontario, Canada

^ Membership of the Canadian Immunization Research Network is provided on the internet network's website.
